# Supplementary material for: An Erythroid Differentiation Signature Predicts Response to Lenalidomide in Myelodysplastic Syndrome
Source: PLOS journal article supplement (doi:10.1371/journal.pmed.0050035), 2008-02-06
Supplement: S1 (10.1371/journal.pmed.0050035.s001) [file journal.pmed.0050035.st001.xls]

## Sheet: Table S1
Sample #	Scan Name	Microarray Type	Sample set	Description	5q status
6	NG2004122906AA	HG_U133 Plus 2.0	Training set	NR
9	NG2004122909AA	HG_U133 Plus 2.0	Training set	NR
17	NG2004122917AA	HG_U133 Plus 2.0	Training set	NR
19	CL2005030930AA	HG_U133 Plus 2.0	Training set	NR
20	NG2004122920AA	HG_U133 Plus 2.0	Training set	NR
22	NG2004122922AA	HG_U133 Plus 2.0	Training set	NR
24	NG2004122924AA	HG_U133 Plus 2.0	Training set	NR
13	CL2005030928AA	HG_U133 Plus 2.0	Training set	NR
2	NG2004122902AA	HG_U133 Plus 2.0	Training set	R
4	NG2004122904AA	HG_U133 Plus 2.0	Training set	R
14	NG2004122914AA	HG_U133 Plus 2.0	Training set	R
16	CL2005030929AA	HG_U133 Plus 2.0	Training set	R
21	NG2004122921AA	HG_U133 Plus 2.0	Training set	R
23	NG2004122923AA	HG_U133 Plus 2.0	Training set	R
25	NG2004122925AA	HG_U133 Plus 2.0	Training set	R
7	CL2005030927AA	HG_U133 Plus 2.0	Training set	R
47	5500024028416032807795.A06	HG_U133AAofAv2	Test set	NR
54	5500024028416032807795.G06	HG_U133AAofAv2	Test set	NR
65	5500024028416032807795.H04	HG_U133AAofAv2	Test set	NR
66	5500024028416032807795.H03	HG_U133AAofAv2	Test set	NR
69	5500024028416032807795.H06	HG_U133AAofAv2	Test set	NR
78	5500024028416032807795.G07	HG_U133AAofAv2	Test set	NR
81	5500024028416032807795.A04	HG_U133AAofAv2	Test set	NR
3	5500024028416032807795.F05	HG_U133AAofAv2	Test set	R
48	5500024028416032807795.D01	HG_U133AAofAv2	Test set	R
27	NG2004122927AA	HG_U133 Plus 2.0	5q minus	R	5q minus
29	NG2004122929AA	HG_U133 Plus 2.0	5q minus	R	5q minus
30	NG2004122930AA	HG_U133 Plus 2.0	5q minus	R	5q minus
72	5500024028416032807795.A03	HG_U133AAofAv2	Test set	R
75	5500024028416032807795.B03	HG_U133AAofAv2	Test set	R
76	5500024028416032807795.F07	HG_U133AAofAv2	Test set	R
77	5500024028416032807795.E02	HG_U133AAofAv2	Test set	R
73	5500024028416032807795.A05	HG_U133AAofAv2	5q minus	NR	5q minus
31	5500024028416032807795.C05	HG_U133AAofAv2	5q minus	R	5q minus
32	5500024028416032807795.D03	HG_U133AAofAv2	5q minus	R	5q minus
51	5500024028416032807795.D02	HG_U133AAofAv2	5q minus	R	5q minus
53	5500024028416032807795.G02	HG_U133AAofAv2	5q minus	R	5q minus
62	5500024028416032807795.G01	HG_U133AAofAv2	5q minus	R	5q minus
63	5500024028416032807795.B02	HG_U133AAofAv2	5q minus	R	5q minus
64	5500024028416032807795.G03	HG_U133AAofAv2	5q minus	R	5q minus
67	5500024028416032807795.B01	HG_U133AAofAv2	5q minus	R	5q minus
79	5500024028416032807795.D05	HG_U133AAofAv2	5q minus	R	5q minus
Day_2_A	5500014022519111606429.E07	HG_U133AAofAv2	Erythroid Timecourse d2 A
Day_2_B	5500014022519111606429.F07	HG_U133AAofAv2	Erythroid Timecourse d2 B
Day_2_C	5500014022519111606429.G07	HG_U133AAofAv2	Erythroid Timecourse d2 C
Day_4_A	5500014022519111606429.H07	HG_U133AAofAv2	Erythroid Timecourse d4 A
Day_4_B	5500014022519111606429.A09	HG_U133AAofAv2	Erythroid Timecourse d4 B
Day_4_C	5500014022519111606429.B09	HG_U133AAofAv2	Erythroid Timecourse d4 C
Day_7_A	5500014022519111606429.C09	HG_U133AAofAv2	Erythroid Timecourse d7 A
Day_7_B	5500014022519111606429.D09	HG_U133AAofAv2	Erythroid Timecourse d7 B
Day_7_C	5500014022519111606429.E09	HG_U133AAofAv2	Erythroid Timecourse d7 C
Day_10_A	5500014022519111606429.F09	HG_U133AAofAv2	Erythroid Timecourse d10 A
Day_10_B	5500014022519111606429.G09	HG_U133AAofAv2	Erythroid Timecourse d10 B
Day_10_C	5500014022519111606429.H09	HG_U133AAofAv2	Erythroid Timecourse d10 C
